# Supplementary material
Source: PubMed Central journal article supplement (PMC6824903)
Supplement: EMS84683-supplement-Supplemental_Data_Tables.pdf [file EMS84683-supplement-Supplemental_Data_Tables.pdf]

**SUPPLEMENTAL DATA TABLES (ONLINE ONLY)**

**Table 4. Supplementary data: generalized linear model results for Barthel Index and Moca Scores and Mean relative heart rate during training between groups.**

| Outcome measure      | Visit   | DT-TT Group                                   | CT-TT Group                                   | Wald Chi Square Test <sup>a</sup> |                                      |
|----------------------|---------|-----------------------------------------------|-----------------------------------------------|-----------------------------------|--------------------------------------|
|                      |         | <i>Quartile</i><br>(25%; <b>Median</b> ; 75%) | <i>Quartile</i><br>(25%; <b>Median</b> ; 75%) | <i>Effect</i>                     | <i>F-value</i><br>( <i>p-value</i> ) |
| <b>Barthel Index</b> | Week 0  | (19; <b>20</b> ; 20)                          | (19; <b>20</b> ; 20)                          | Group                             |                                      |
|                      | Week 11 | (19; <b>20</b> ; 20)                          | (18; <b>20</b> ; 20)                          | Time                              | 0.121 (0.728)                        |
|                      | Week 22 | (19; <b>20</b> ; 20)                          | (18; <b>20</b> ; 20)                          |                                   |                                      |
| <b>Moca</b>          | Week 0  | (22; <b>26</b> ; 28)                          | (23; <b>26</b> ; 28)                          | Group                             |                                      |
|                      | Week 11 | (24; <b>25</b> ; 28)                          | (25; <b>27</b> ; 28)                          | Time                              | 0.190 (0.728)                        |
|                      | Week 22 | (25; <b>27</b> ; 28)                          | (26; <b>27</b> ; 28)                          |                                   |                                      |

|                                                 | Visit                       | DT-TT Group | CT-TT Group | Independent T-test <sup>b</sup> |    |         |
|-------------------------------------------------|-----------------------------|-------------|-------------|---------------------------------|----|---------|
|                                                 |                             |             |             | t                               | df | p-value |
| Mean Relative Heart Rate (% HR <sub>max</sub> ) | Training week 1             | 61 ± 10     | 60 ± 10     | 0.31                            | 39 | 0.760   |
|                                                 | Final Training week         | 62 ± 13     | 66 ± 9      | -0.96                           | 39 | 0.340   |
|                                                 | Change week 1 to final week | +4 ± 10     | +7 ± 8      | -1.35                           | 38 | 0.180   |

**DT-TT: Dual Task Treadmill Training, CT-TT: Control Treadmill Training**

**Table 5. Training parameters for the control treadmill training and dual task treadmill training group.**

|                                                         | CT-TT<br>(Mean ± SD) | DT-TT<br>(Mean ± SD) | t     | df | p.value |
|---------------------------------------------------------|----------------------|----------------------|-------|----|---------|
| Mean speed - week 1 (km/h)                              | 2.2 ± 1.6            | 2.5 ± 1.3            | -0.65 | 41 | 0.52    |
| End speed (km/h)                                        | 2.9 ± 1.5            | 3.4 ± 1.6            | -1.00 | 41 | 0.32    |
| Change in speed (km/h)                                  | +0.8 ± 0.6           | +1.0 ± 0.7           | -1.21 | 41 | 0.23    |
| Mean training duration – week 1 (min)                   | 29 ± 11              | 31 ± 9               | -0.76 | 36 | 0.46    |
| End training duration (min)                             | 41 ± 7               | 42 ± 6               | -0.41 | 40 | 0.68    |
| Change in training duration (min)                       | +13 ± 11             | +12 ± 8              | 0.40  | 37 | 0.69    |
| Mean distance walked - week 1 (km)                      | 1.2 ± 1.2            | 1.3 ± 0.9            | -0.29 | 36 | 0.77    |
| End distance walked (km)                                | 2.1 ± 1.2            | 2.3 ± 1.2            | -0.61 | 39 | 0.54    |
| Change in distance walked (km)                          | +0.9 ± 0.6           | +1.0 ± 0.6           | -0.50 | 36 | 0.62    |
| Mean relative heart rate – week 1 (%HR <sub>max</sub> ) | 60 ± 10              | 61 ± 10              | -0.31 | 39 | 0.76    |
| End relative heart rate (%HR <sub>max</sub> )           | 66 ± 9               | 62 ± 13              | 0.96  | 39 | 0.34    |
| Change in relative heart rate (%HR <sub>max</sub> )     | +7 ± 8               | +4 ± 10              | 1.35  | 38 | 0.18    |

**DT-TT: Dual Task Treadmill Training, CT-TT: Control Treadmill Training**
